# Supplementary material for: Analysis of Polyphenol Extract from Hazel Leaf and Ameliorative Efficacy and Mechanism against Hyperuricemia Zebrafish Model via Network Pharmacology and Molecular Docking
Source: MDPI journal article supplement (doi:10.3390/molecules29020317), 2024-01-08
Supplement: s1 [file s1]

## Supplementary Material

**Table S1. Identification and relative contents of components in hazel leaf polyphenols.**

| Compound                             | Chemical formula                                | Relative content<br>( $\times 10^4$ ) |
|--------------------------------------|-------------------------------------------------|---------------------------------------|
| Gallic acid                          | C <sub>7</sub> H <sub>6</sub> O <sub>5</sub>    | 31.3 $\pm$ 6.22                       |
| Gallocatechin                        | C <sub>15</sub> H <sub>14</sub> O <sub>7</sub>  | 2.79 $\pm$ 0.57                       |
| 2,5-dihydroxybenzoic acid            | C <sub>7</sub> H <sub>6</sub> O <sub>4</sub>    | 5.78 $\pm$ 1.26                       |
| Chlorogenic acid                     | C <sub>16</sub> H <sub>18</sub> O <sub>9</sub>  | 4.13 $\pm$ 0.21                       |
| Quercetin-3-O-beta-D-glucopyranoside | C <sub>21</sub> H <sub>20</sub> O <sub>12</sub> | 36.75 $\pm$ 7.61                      |
| P-Coumaric acid                      | C <sub>9</sub> H <sub>8</sub> O <sub>3</sub>    | 16.33 $\pm$ 3.89                      |
| Myricetin                            | C <sub>15</sub> H <sub>10</sub> O <sub>8</sub>  | 74.32 $\pm$ 12.87                     |
| Pedalitin                            | C <sub>16</sub> H <sub>12</sub> O <sub>7</sub>  | 4.23 $\pm$ 0.91                       |
| Quercetin                            | C <sub>15</sub> H <sub>10</sub> O <sub>7</sub>  | 154.91 $\pm$ 24.28                    |
| Luteolin-7-O-glucoside               | C <sub>21</sub> H <sub>20</sub> O <sub>11</sub> | 73.07 $\pm$ 18.04                     |
| Caffeic acid                         | C <sub>9</sub> H <sub>8</sub> O <sub>4</sub>    | 14.27 $\pm$ 2.07                      |
| Resveratrol                          | C <sub>14</sub> H <sub>12</sub> O <sub>3</sub>  | 4.59 $\pm$ 0.52                       |
| Luteolin                             | C <sub>15</sub> H <sub>10</sub> O <sub>6</sub>  | 21.29 $\pm$ 6.22                      |
| Ellagic acid                         | C <sub>14</sub> H <sub>6</sub> O <sub>8</sub>   | 15.79 $\pm$ 4.37                      |
| Hydroxybenzoic acid                  | C <sub>7</sub> H <sub>6</sub> O <sub>3</sub>    | 6.25 $\pm$ 1.30                       |
| Quercetin-3-O-beta-D-glucuronide     | C <sub>21</sub> H <sub>18</sub> O <sub>13</sub> | 6.43 $\pm$ 0.60                       |
| Kaempferol-3-O-rhamnoside            | C <sub>21</sub> H <sub>20</sub> O <sub>10</sub> | 27.77 $\pm$ 5.36                      |

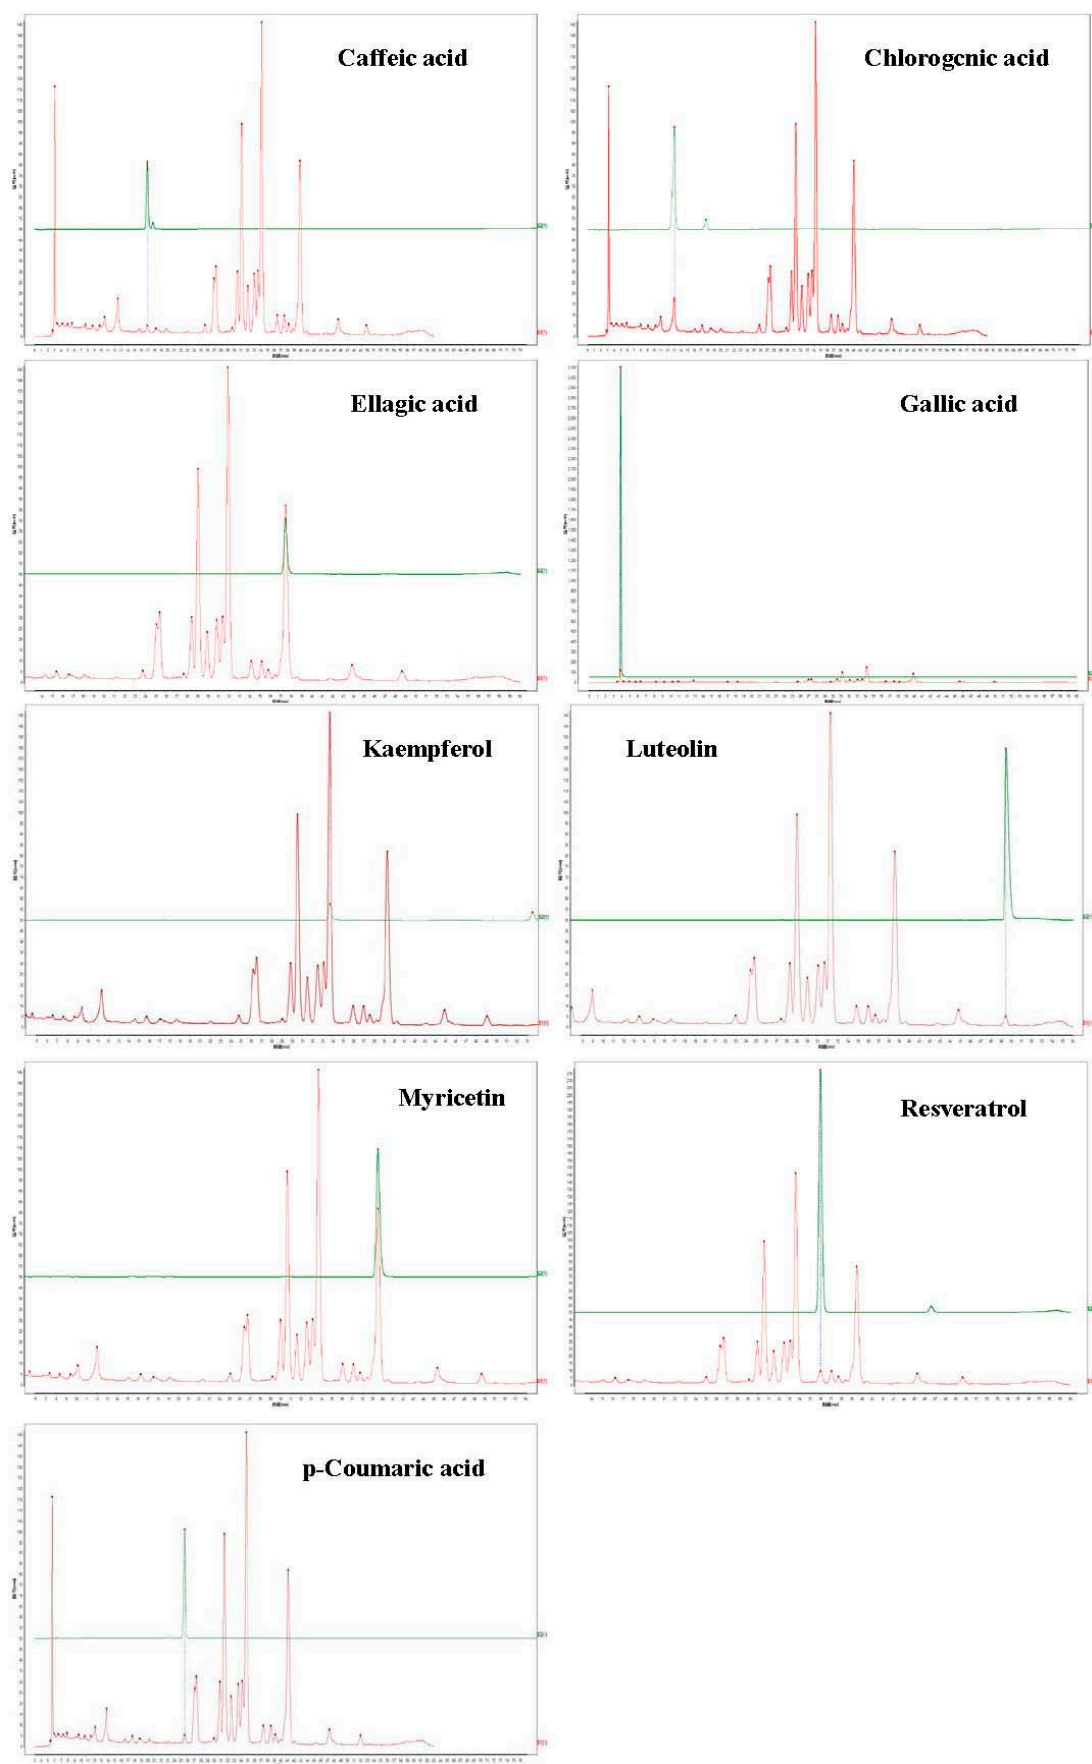

**Figure S1. Composition of hazel leaf polyphenols versus standards.**

**Table S2. Acute toxicity test of hazel leaf polyphenols in zebrafish.**

| <b>Groups</b> | <b>Hazel leaf polyphenols<br/>(<math>\mu</math> g/mL)</b> | <b>Mortality rate<br/>(%)</b> |
|---------------|-----------------------------------------------------------|-------------------------------|
| 1             | 1000                                                      | 98                            |
| 2             | 700                                                       | 51                            |
| 3             | 500                                                       | 23                            |
| 4             | 300                                                       | 16                            |
| 5             | 100                                                       | 0                             |
